# Supplementary material for: Structure modulation in zinc–ditetrazolate coordination polymers by in situ ligand synthesis
Source: Royal Society of Chemistry journal article supplement (doi:10.1039/c5ra15576b), 2015-01-01
Supplement: c5ra15576b1.pdf [file c5ra15576b1.pdf]

## Electronic Supporting Information (ESI)

for

### Structure modulation in zinc-ditetrazolate coordination polymers by *in situ* ligand synthesis

Yun-Wu Li,<sup>a,b</sup> Hui-Yan Ma,<sup>a</sup> Su-Na Wang,<sup>a</sup> Jian Xu,<sup>\*b</sup> Da-Cheng Li,<sup>\*a</sup> Jian-Min Dou<sup>\*a</sup> and Xian-He Bu<sup>b</sup>

<sup>a</sup>*School of Chemistry and Chemical Engineering, and Shandong Provincial Key Laboratory of Chemical Energy Storage and Novel Cell Technology, Liaocheng University, Liaocheng 252000, P. R. China.*

<sup>b</sup>*Department of Chemistry, TKL of Metal- and Molecule-Based Material Chemistry, and Collaborative Innovation Center of Chemical Science and Engineering (Tianjin), Nankai University, Tianjin 300071, P. R. China.*

---

\*To whom correspondence should be addressed. E-mail: [jxu@nankai.edu.cn](mailto:jxu@nankai.edu.cn) (Jian Xu); [lidacheng62@lcu.edu.cn](mailto:lidacheng62@lcu.edu.cn) (Da-Cheng Li); and [dougroup@163.com](mailto:dougroup@163.com) (Jian-Min Dou).

---

Figures in Supporting Information

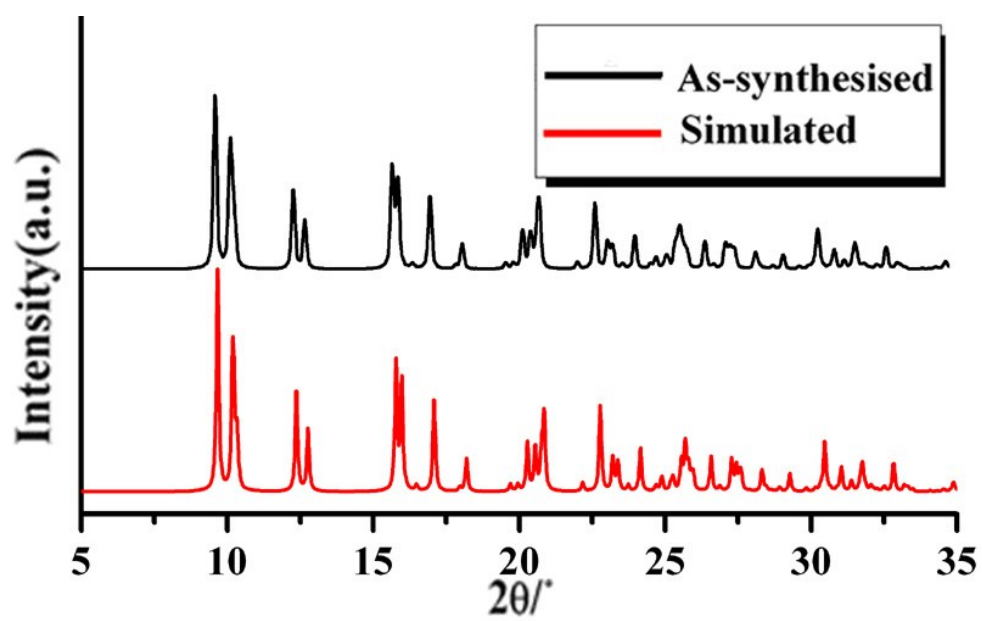

Fig. S1. XRPD patterns for 1.

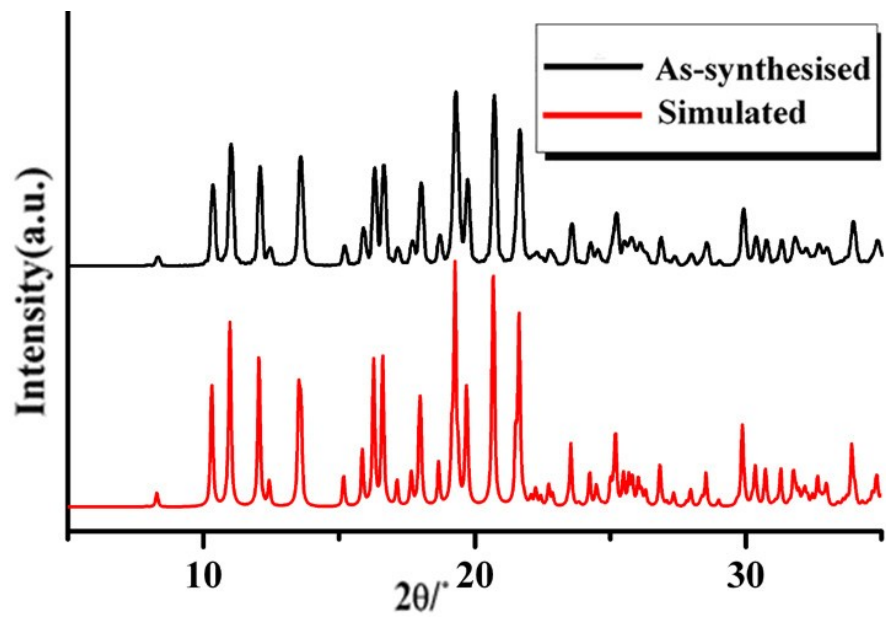

Fig. S2. XRPD patterns for 2.

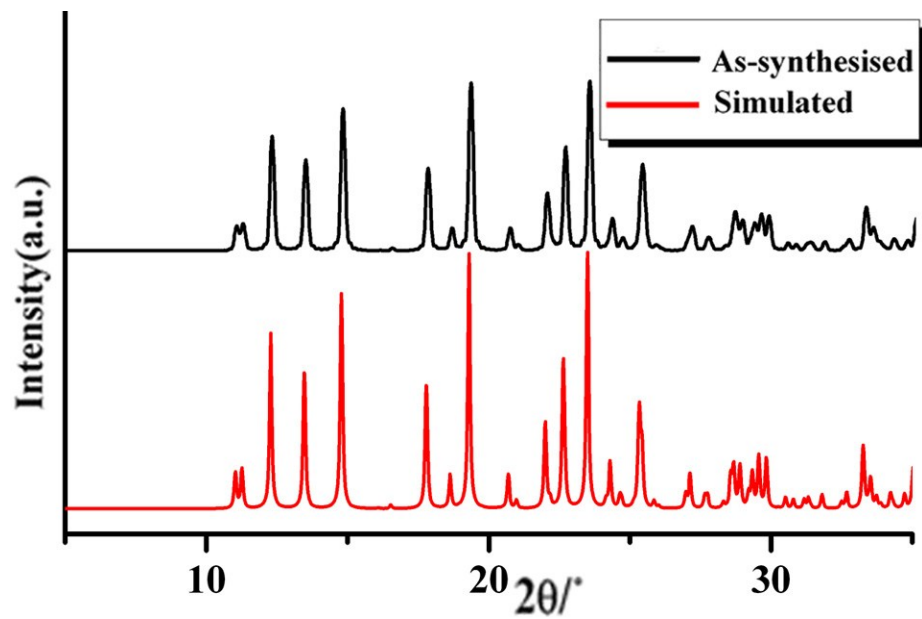

Fig. S3. XRPD patterns for 3.

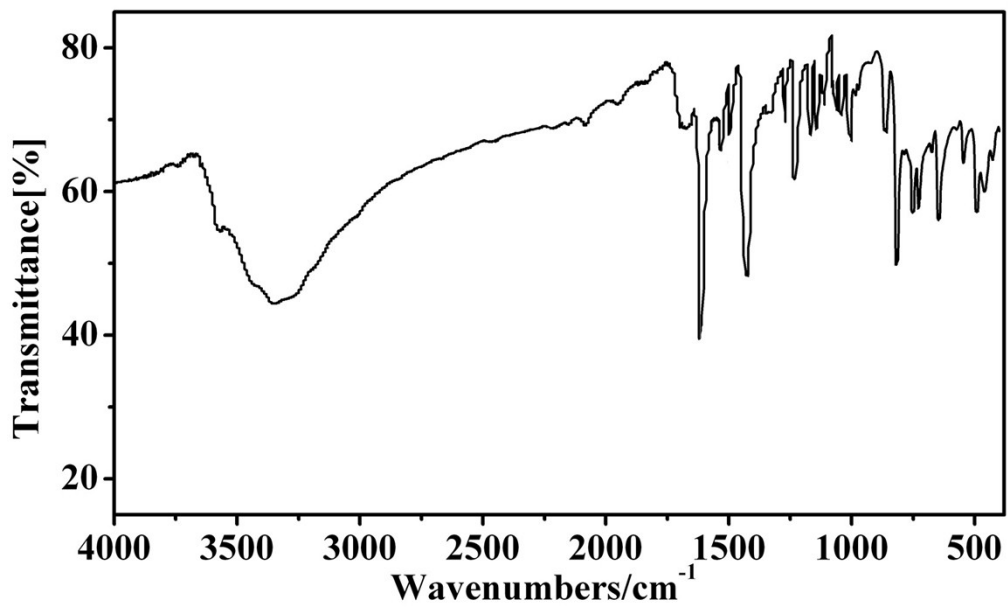

Fig. S4. IR spectrum of compound 1.

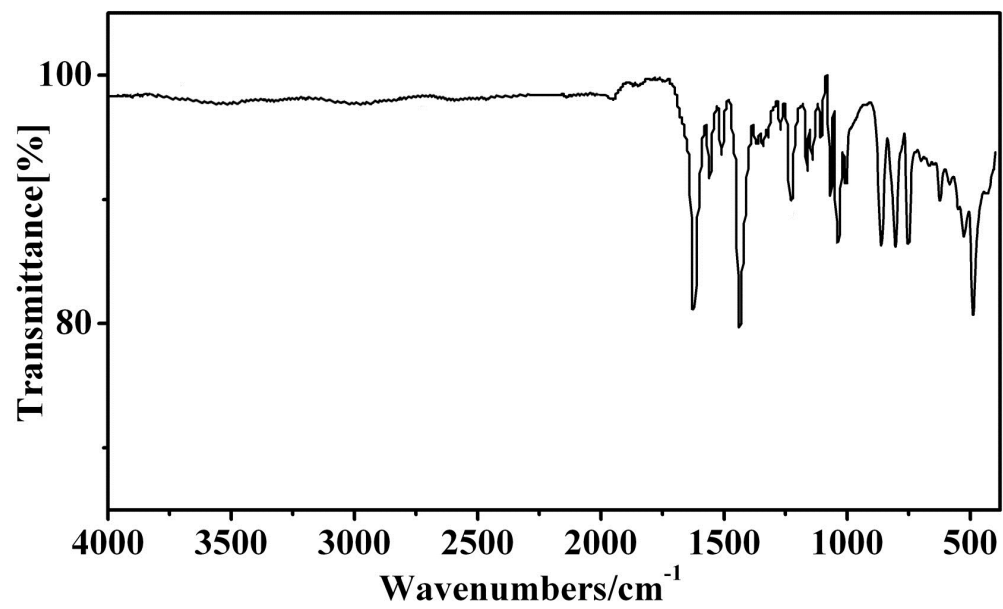

Fig. S5. IR spectrum of compound 2.

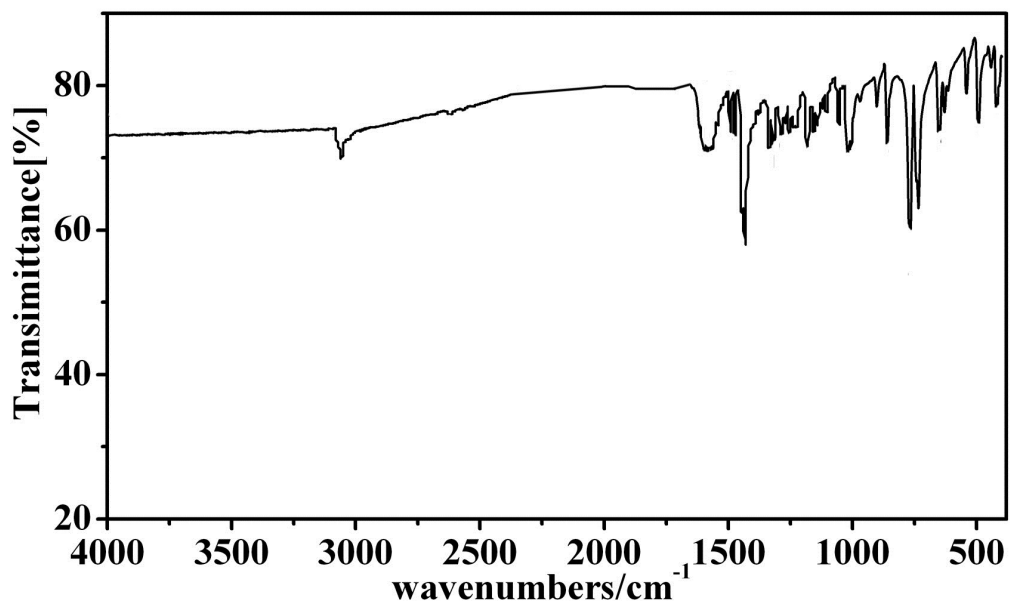

**Fig. S6.** IR spectrum of compound 3.

---

## The $\pi$ - $\pi$ stacking interactions

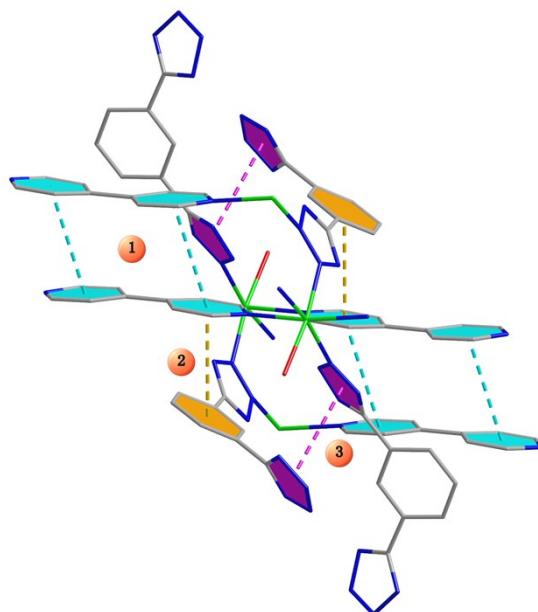

**Fig. S7.** The  $\pi$ - $\pi$  stacking interactions (blue, orange and purple dashed lines) in **1**. Color codes: Zn-(green), C-(gray), O-(red), N-(blue). Hydrogen atoms are omitted for clarity.

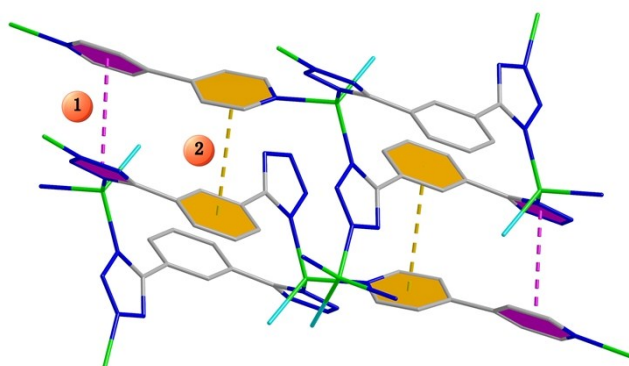

**Fig. S8.** The  $\pi$ - $\pi$  stacking interactions (orange and purple dashed lines) in **2**. Color codes: Zn-(green), C-(gray), O-(red), N-(blue). Hydrogen atoms are omitted for clarity.



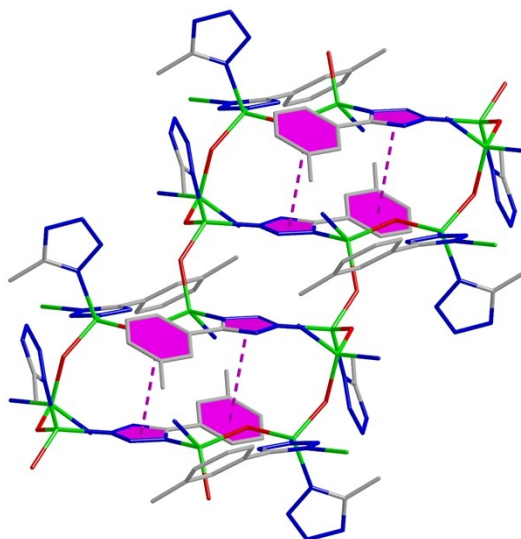

**Fig. S9.** The  $\pi$ - $\pi$  stacking interactions (purple dashed lines) in **3**. Color codes: Zn-(green), C-(gray), O-(red), N-(blue). Hydrogen atoms are omitted for clarity.

**Table S1**  $\pi$ - $\pi$  contacts ( $\text{\AA}$  and  $^\circ$ ) in **1-3**.

|          | Group 1 ... Group 2                               | CCD      | DA        |
|----------|---------------------------------------------------|----------|-----------|
| <b>1</b> | Cg <sub>(purple)</sub> ... Cg <sub>(purple)</sub> | 3.799(3) | 3.3(2)    |
|          | Cg <sub>(blue)</sub> ... Cg <sub>(blue)</sub>     | 3.797(3) | 6.8(2)    |
|          | Cg <sub>(blue)</sub> ... Cg <sub>(orange)</sub>   | 3.759(3) | 23.99(17) |
| <b>2</b> | Cg <sub>(purple)</sub> ... Cg <sub>(purple)</sub> | 3.640(2) | 2.5(2)    |
|          | Cg <sub>(orange)</sub> ... Cg <sub>(orange)</sub> | 4.065(2) | 16.14(19) |
| <b>3</b> | Cg <sub>(purple)</sub> ... Cg <sub>(purple)</sub> | 3.916(5) | 25.8(4)   |

“Cg” means the different kind of rings, “CCD” is the centroid-to-centroid distance and “DA” is the dihedral angle between rings.

## The UV-vis spectra

The UV-vis absorption spectra of the samples **1-3** in the solid state are shown in Fig. S10. These three compounds all exhibit low energy bands from 200 to 320 nm. Compounds **1** and **2** show two similar absorption energy bands at maximum 209 and 237 nm, 209 and 236 nm, respectively, which can be assigned to ligand-to-metal charge transfer transitions.<sup>S1</sup> While compound **3** reveals three absorption energy bands at maximum 212, 246 and 303 nm, which also can be ascribed to ligand-to-metal charge transfer transitions. The presence of the third absorption band at 303 nm is probably the effect of the OH<sup>-</sup> groups which links two different Zn<sup>2+</sup> ions to give a binuclear {Zn<sub>2</sub>} cluster.<sup>S2</sup>

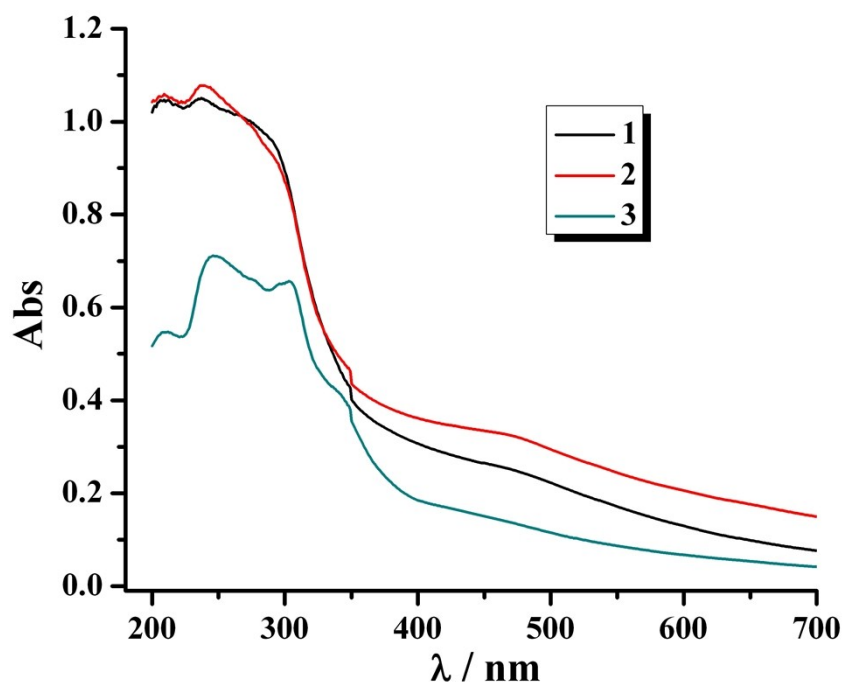

**Fig. S10.** UV-vis spectrum of compounds **1-3**.

S1. (1) Z. Q. Shi, Y. Z. Li, Z. J. Guo and H. G. Zheng, *CrystEngComm.*, 2014, **16**, 900; (b) W. W. Xiong, E. U. Athresh, Y. T. Ng, J. F. Ding, T. Wu and Q. C. Zhang, *J. Am. Chem. Soc.*, 2013, **135**, 1256.

S2. (a) V. Béreau, *Inorg. Chem. Commun.*, 2004, **7**, 829; (b) B. Liu, J. Yang, G. C. Yang, J. F. Ma, *Inorg. Chem.*, 2013, **52**, 84.

---

## The fluorescence lifetime

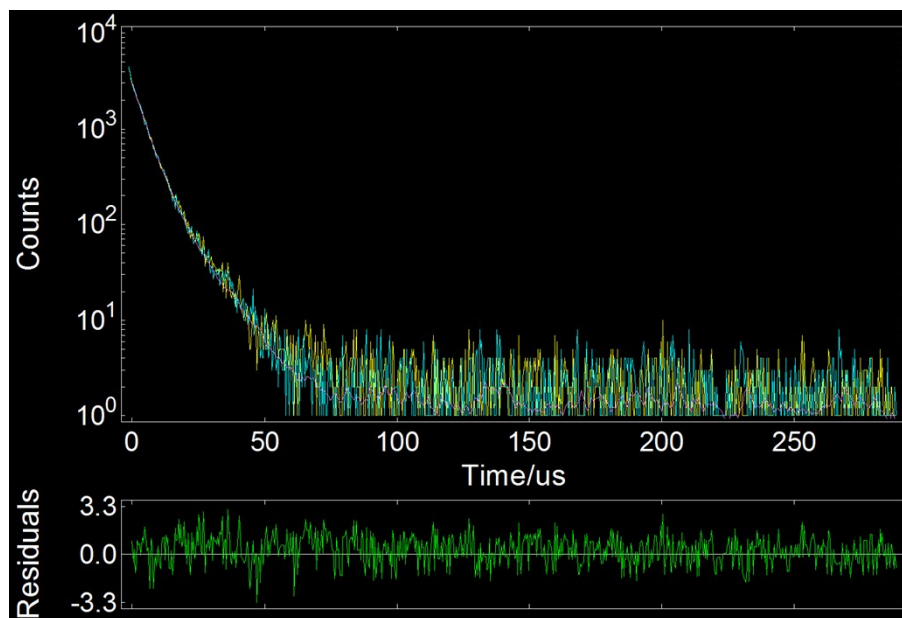

**Fig. S11.** Fluorescence decay curves for compound **1**. The scattering points are experimental data and the solid lines are the fitting results.

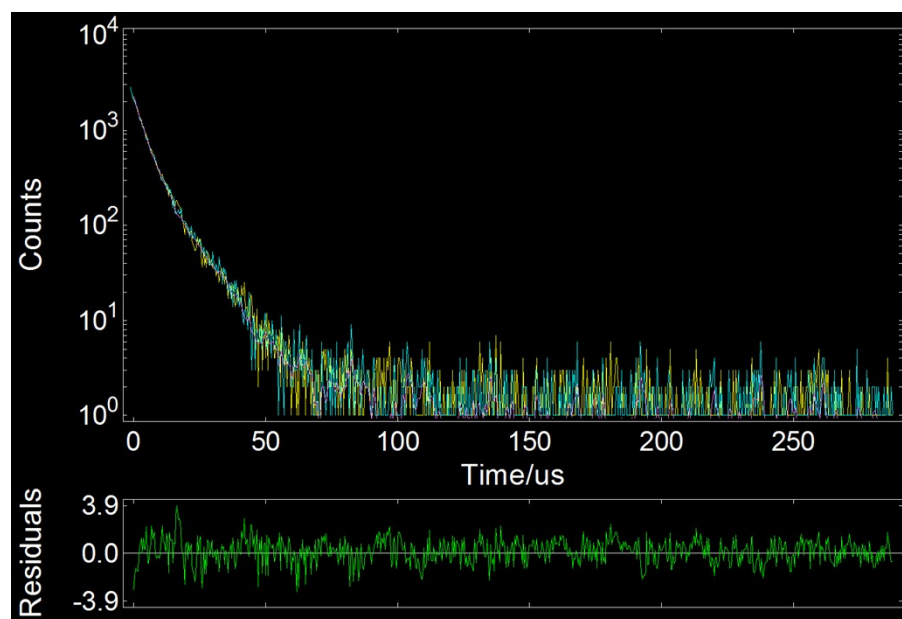

**Fig. S12.** Fluorescence decay curves for compound **2**. The scattering points are experimental data and the solid lines are the fitting results.

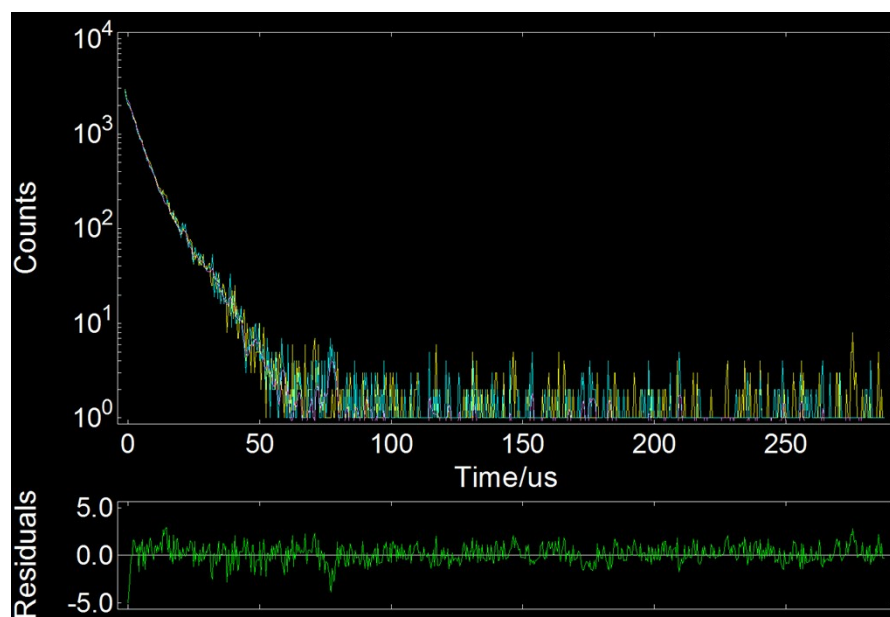

**Fig. S13.** Fluorescence decay curves for compound **3**. The scattering points are experimental data and the solid lines are the fitting results.

**Table S2** The selected bond lengths [Å] and angles [°] of compound **1**.

---

| <b>1</b>        |          |                     |          |
|-----------------|----------|---------------------|----------|
| Zn(1)-O(1)      | 1.910(5) | Zn(2)-N(8)#2        | 2.026(5) |
| Zn(1)-O(2)      | 1.912(5) | Zn(2)-N(4)#3        | 2.037(5) |
| Zn(1)-N(2)      | 2.004(6) | N(4)-Zn(2)#6        | 2.037(5) |
| Zn(1)-N(5)      | 2.029(6) | N(8)-Zn(2)#7        | 2.026(5) |
| Zn(2)-O(2)#1    | 1.904(5) | O(2)-Zn(2)#8        | 1.904(5) |
| Zn(2)-O(1)      | 1.933(5) |                     |          |
| O(1)-Zn(1)-O(2) | 105.1(2) | O(2)#1-Zn(2)-O(1)   | 103.0(2) |
| O(1)-Zn(1)-N(2) | 112.6(2) | O(2)#1-Zn(2)-N(8)#2 | 118.0(2) |
| O(2)-Zn(1)-N(2) | 115.0(2) | O(1)-Zn(2)-N(8)#2   | 109.7(2) |
| O(1)-Zn(1)-N(5) | 109.9(2) | O(2)#1-Zn(2)-N(4)#3 | 109.3(2) |
| O(2)-Zn(1)-N(5) | 108.2(2) | O(1)-Zn(2)-N(4)#3   | 113.8(2) |
| N(2)-Zn(1)-N(5) | 106.0(2) | N(8)#2-Zn(2)-N(4)#3 | 103.4(2) |

Symmetry transformations used to generate equivalent atoms: #1: x, -y+3/2, z-1/2; #2: x-1, -y+3/2, z-1/2; #3: -x+1, y-1/2, -z+3/2; #6: -x+1, y+1/2, -z+3/2; #7: x+1, -y+3/2, z+1/2; #8: x, -y+3/2, z+1/2.

---

**Table S3** The selected bond lengths [Å] and angles [°] of compound **2**.

---

| <b>2</b>           |            |                      |            |
|--------------------|------------|----------------------|------------|
| Zn(1)-N(1)         | 2.013(3)   | Zn(2)-N(10)#3        | 2.031(3)   |
| Zn(1)-N(9)         | 2.035(3)   | Zn(2)-Cl(2)          | 2.1889(13) |
| Zn(1)-N(5)#1       | 2.038(3)   | N(5)-Zn(1)#1         | 2.038(3)   |
| Zn(1)-Cl(1)        | 2.2006(13) | N(7)-Zn(2)#4         | 2.000(3)   |
| Zn(2)-N(7)#2       | 2.000(3)   | N(10)-Zn(2)#5        | 2.031(3)   |
| Zn(2)-N(3)         | 2.010(3)   |                      |            |
| N(1)-Zn(1)-N(9)    | 106.39(12) | N(7)#2-Zn(2)-N(3)    | 103.85(13) |
| N(1)-Zn(1)-N(5)#1  | 103.72(12) | N(7)#2-Zn(2)-N(10)#3 | 111.47(13) |
| N(9)-Zn(1)-N(5)#1  | 106.60(12) | N(3)-Zn(2)-N(10)#3   | 105.16(13) |
| N(1)-Zn(1)-Cl(1)   | 117.10(9)  | N(7)#2-Zn(2)-Cl(2)   | 117.29(10) |
| N(9)-Zn(1)-Cl(1)   | 108.44(10) | N(3)-Zn(2)-Cl(2)     | 108.86(10) |
| N(5)#1-Zn(1)-Cl(1) | 113.88(9)  | N(10)#3-Zn(2)-Cl(2)  | 109.37(9)  |

Symmetry transformations used to generate equivalent atoms: #1: -x+1, -y+2, -z; #2: x, y, z+1; #3: x+1, y+1, z; #4: x, y, z-1; #5: x-1, y-1, z.

---

---

**Table S4** The selected bond lengths [ $\text{\AA}$ ] and angles [ $^\circ$ ] of compound **3**.

---

| <b>3</b>        |          |                     |          |
|-----------------|----------|---------------------|----------|
| Zn(1)-O(1)      | 1.910(5) | Zn(2)-N(8)#2        | 2.026(5) |
| Zn(1)-O(2)      | 1.912(5) | Zn(2)-N(4)#3        | 2.037(5) |
| Zn(1)-N(2)      | 2.004(6) | N(4)-Zn(2)#6        | 2.037(5) |
| Zn(1)-N(5)      | 2.029(6) | N(8)-Zn(2)#7        | 2.026(5) |
| Zn(2)-O(2)#1    | 1.904(5) | O(2)-Zn(2)#8        | 1.904(5) |
| Zn(2)-O(1)      | 1.933(5) |                     |          |
|                 |          |                     |          |
| O(1)-Zn(1)-O(2) | 105.1(2) | O(2)#1-Zn(2)-O(1)   | 103.0(2) |
| O(1)-Zn(1)-N(2) | 112.6(2) | O(2)#1-Zn(2)-N(8)#2 | 118.0(2) |
| O(2)-Zn(1)-N(2) | 115.0(2) | O(1)-Zn(2)-N(8)#2   | 109.7(2) |
| O(1)-Zn(1)-N(5) | 109.9(2) | O(2)#1-Zn(2)-N(4)#3 | 109.3(2) |
| O(2)-Zn(1)-N(5) | 108.2(2) | O(1)-Zn(2)-N(4)#3   | 113.8(2) |
| N(2)-Zn(1)-N(5) | 106.0(2) | N(8)#2-Zn(2)-N(4)#3 | 103.4(2) |

Symmetry transformations used to generate equivalent atoms: #1:  $x, -y+3/2, z-1/2$ ;  
#2:  $x-1, -y+3/2, z-1/2$ ; #3:  $-x+1, y-1/2, -z+3/2$ ; #6:  $-x+1, y+1/2, -z+3/2$ ; #7:  $x+1, -y+3/2, z+1/2$ ; #8:  $x, -y+3/2, z+1/2$

---
